# Supplementary material
Source: Springer Nature journal article supplement (https://www.springermedizin.de/resource/supplementary/12984_2008_155_MOESM5_ESM.pdf/9605420)

### Shoulder Torque Sign

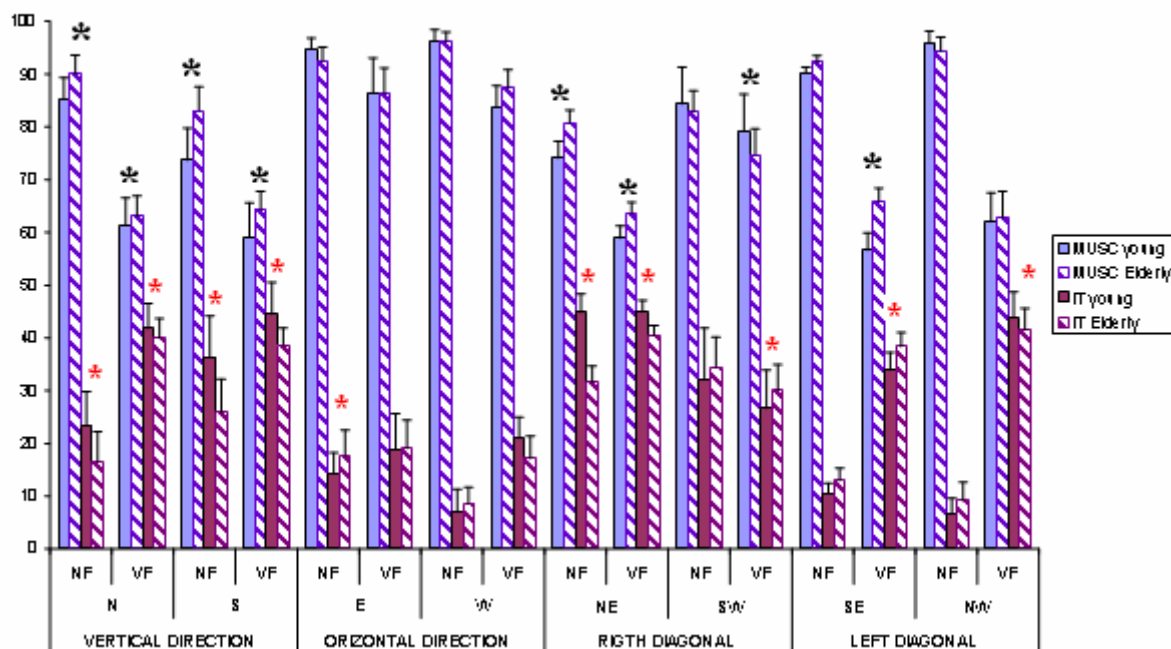

### Elbow Torque sign

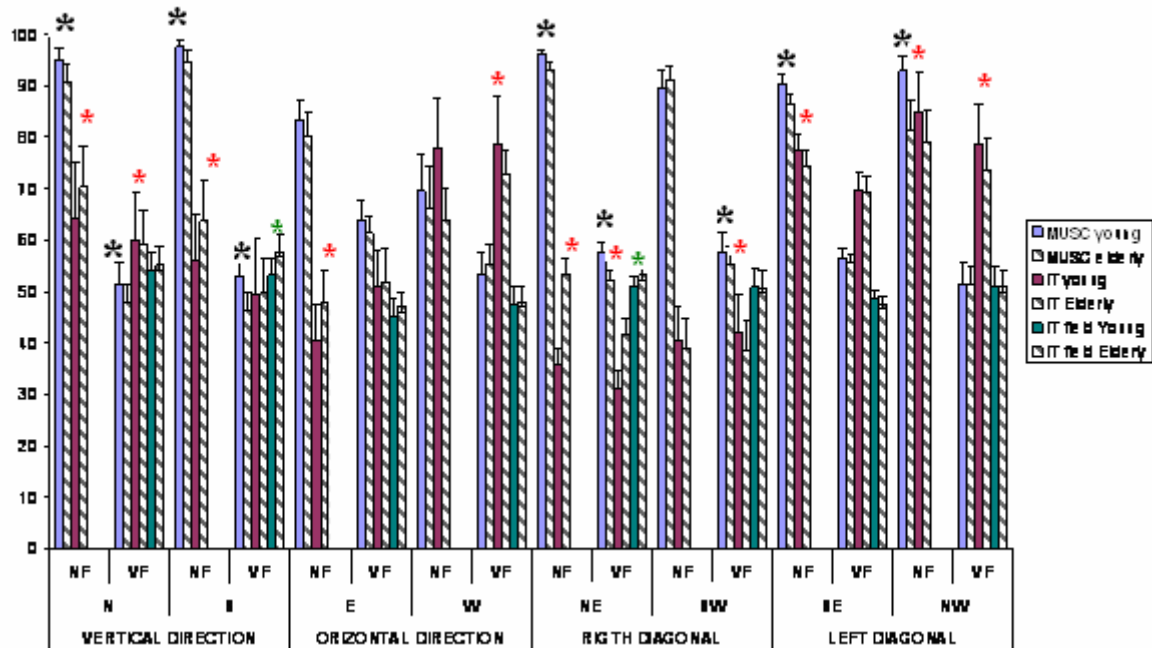

Supplement: MOESM5 [file 9605420]
